# Supplementary material
Source: PubMed Central journal article supplement (PMC4442595)
Supplement: Supp_Figure1.pdf [file Supp_Figure1.pdf]

## Supplementary Data

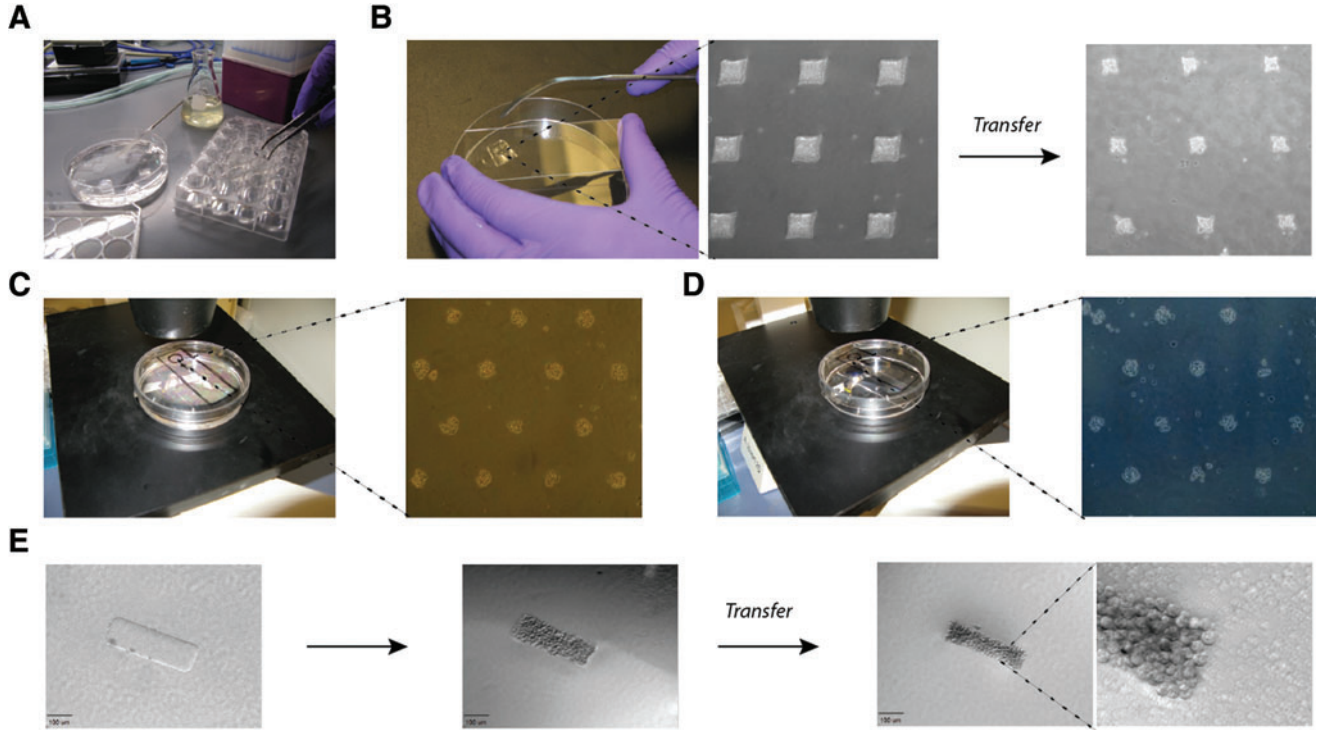

**SUPPLEMENTARY FIG. S1.** (A) Sample image of a polydimethylsiloxane stamp with microposts being lowered onto a bed of liquid gelatin contained within the well of a 24-well plate. (B) Sample image of a gelatin mold of rectangular ( $100 \times 100 \times 40 \mu\text{m}$ ) microwells filled with MDCK cells and being transferred onto a poly-lysine-coated slide. The microscopy images to the right are at  $10\times$  magnification. (C) Sample image of a gelatin mold of cylindrical microwells filled with MDCK cells and transferred onto a poly-lysine-coated slide. (D) Sample image of (C) after addition of Trypan blue. (E) Phase microscopy images summarizing the Sacrificial Micromolding procedure used for transferring rectangular gelatin microwells filled with MDCK cells into Matrigel.
